# Supplementary material
Source: PubMed Central journal article supplement (PMC3172133)
Supplement: NIHMS288388-supplement-Supplementary_Figures.pdf [file NIHMS288388-supplement-Supplementary_Figures.pdf]

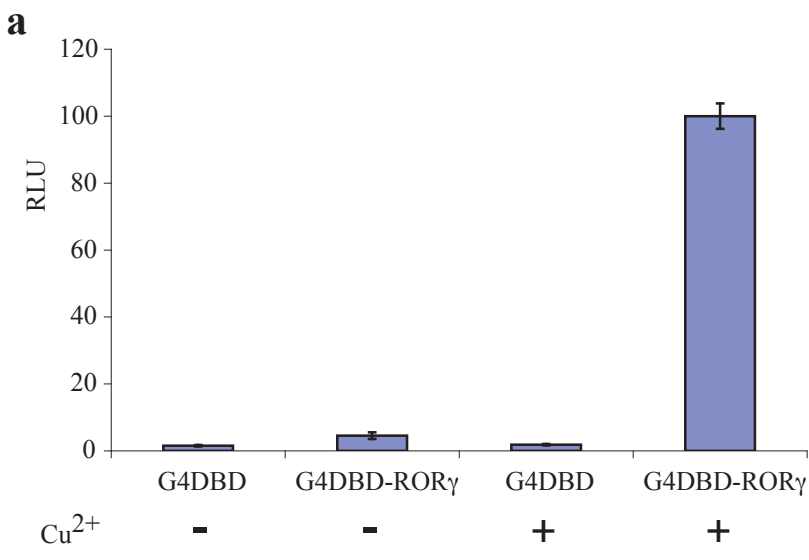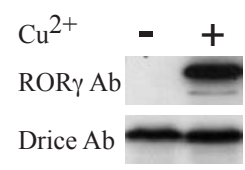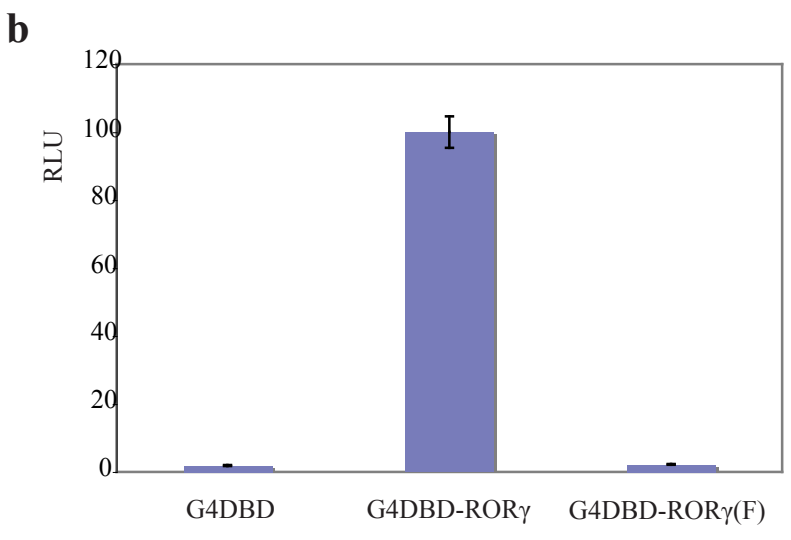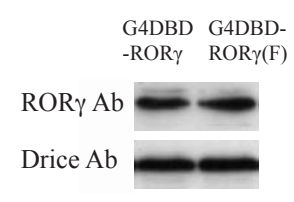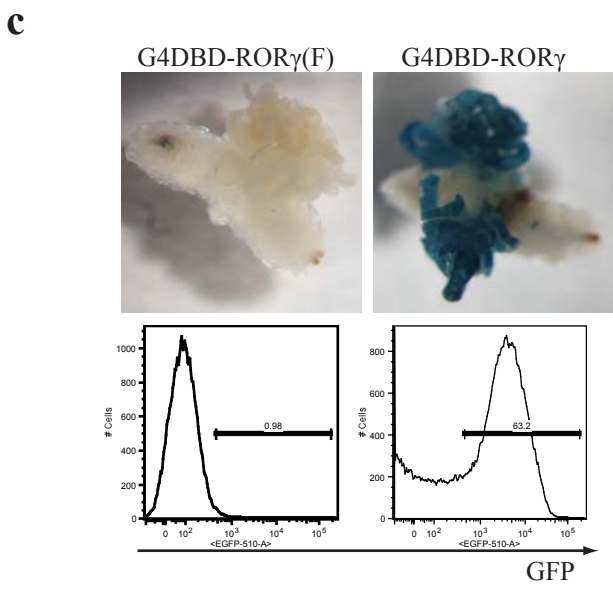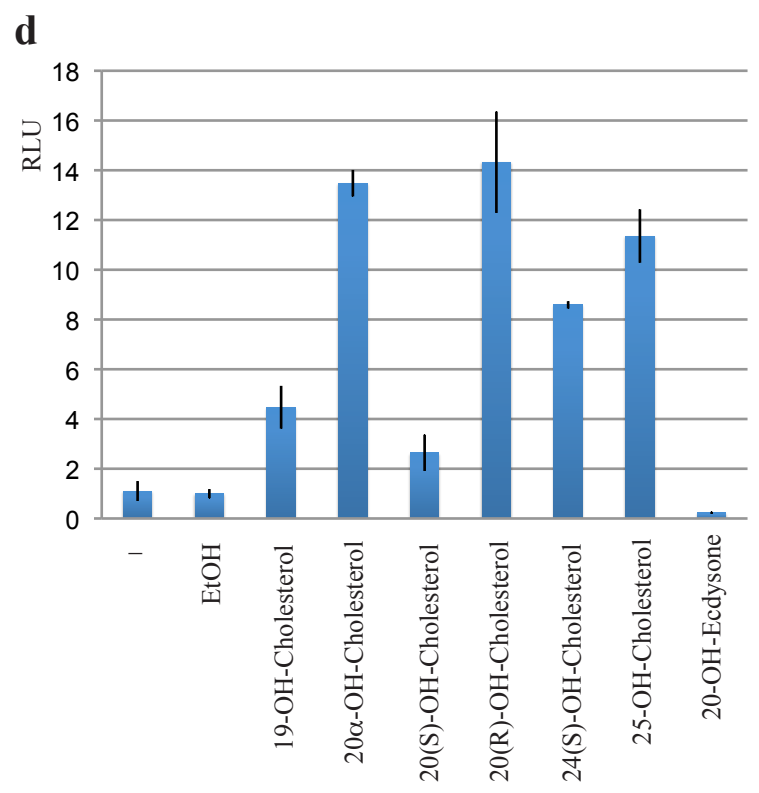

Supplementary figure 1

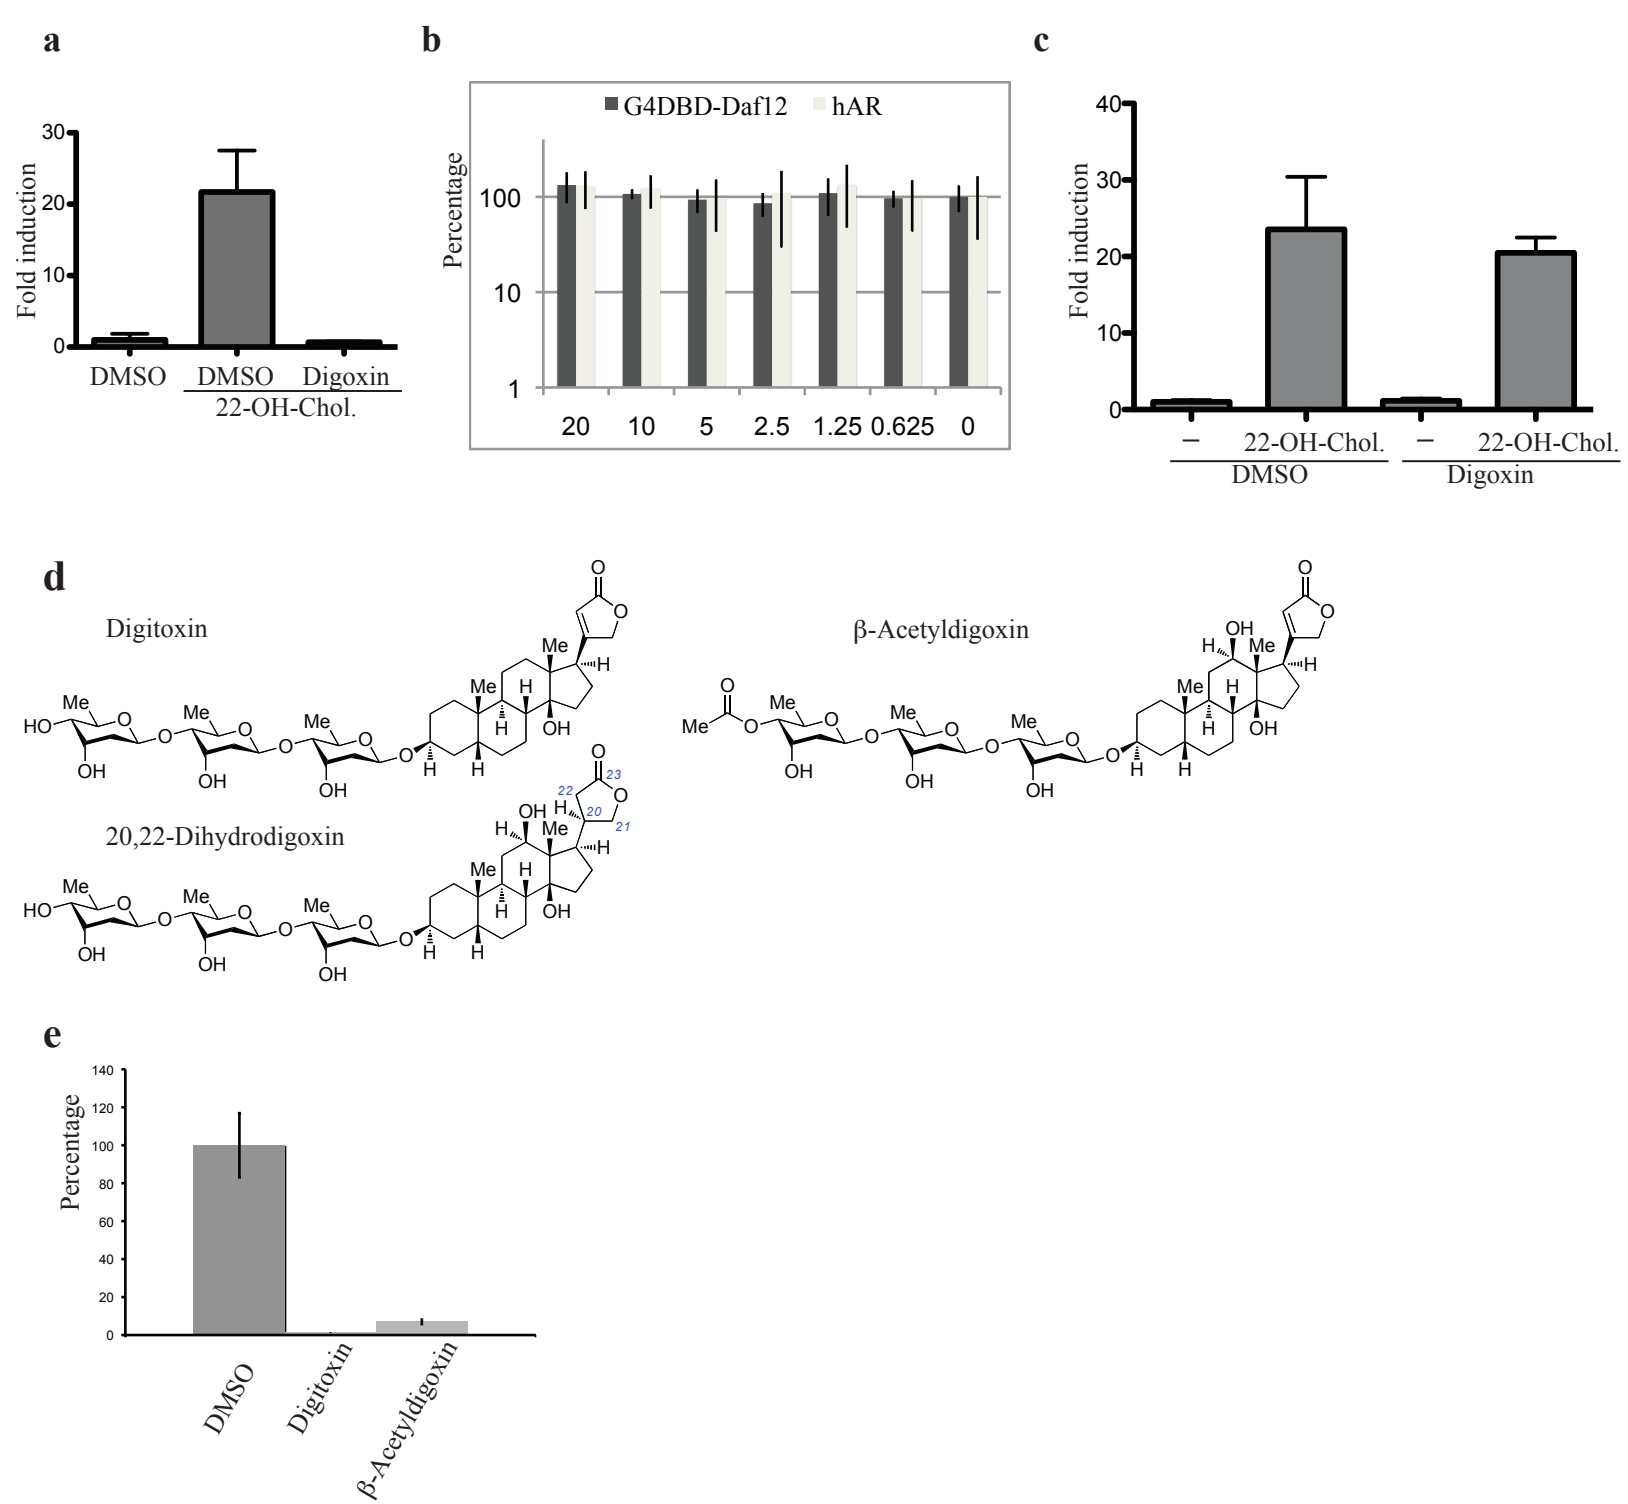

Supplementary figure 2

**a**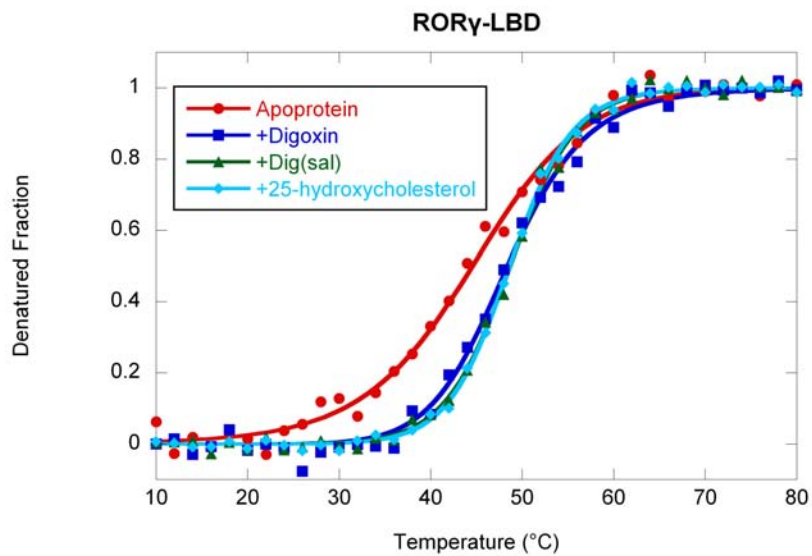**b**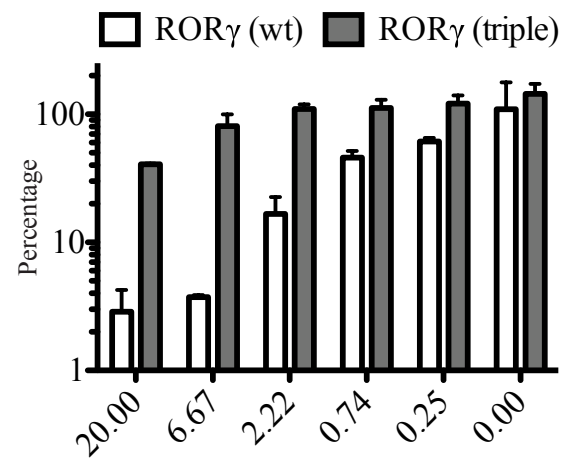**c**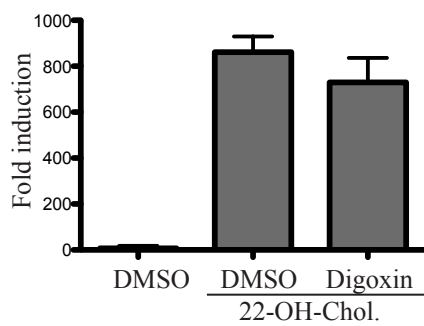**d**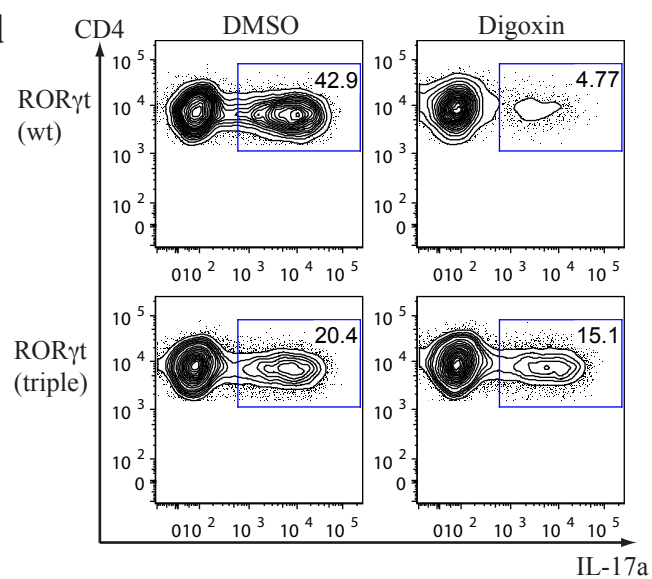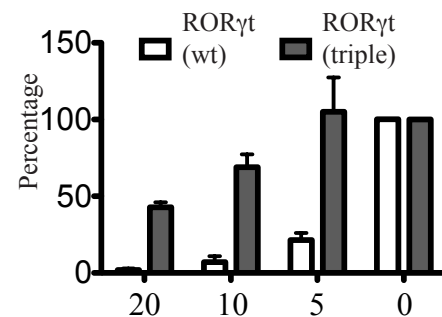**e**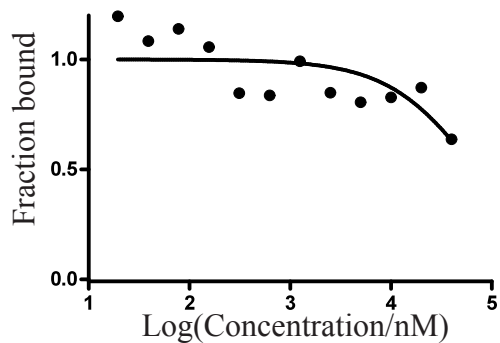

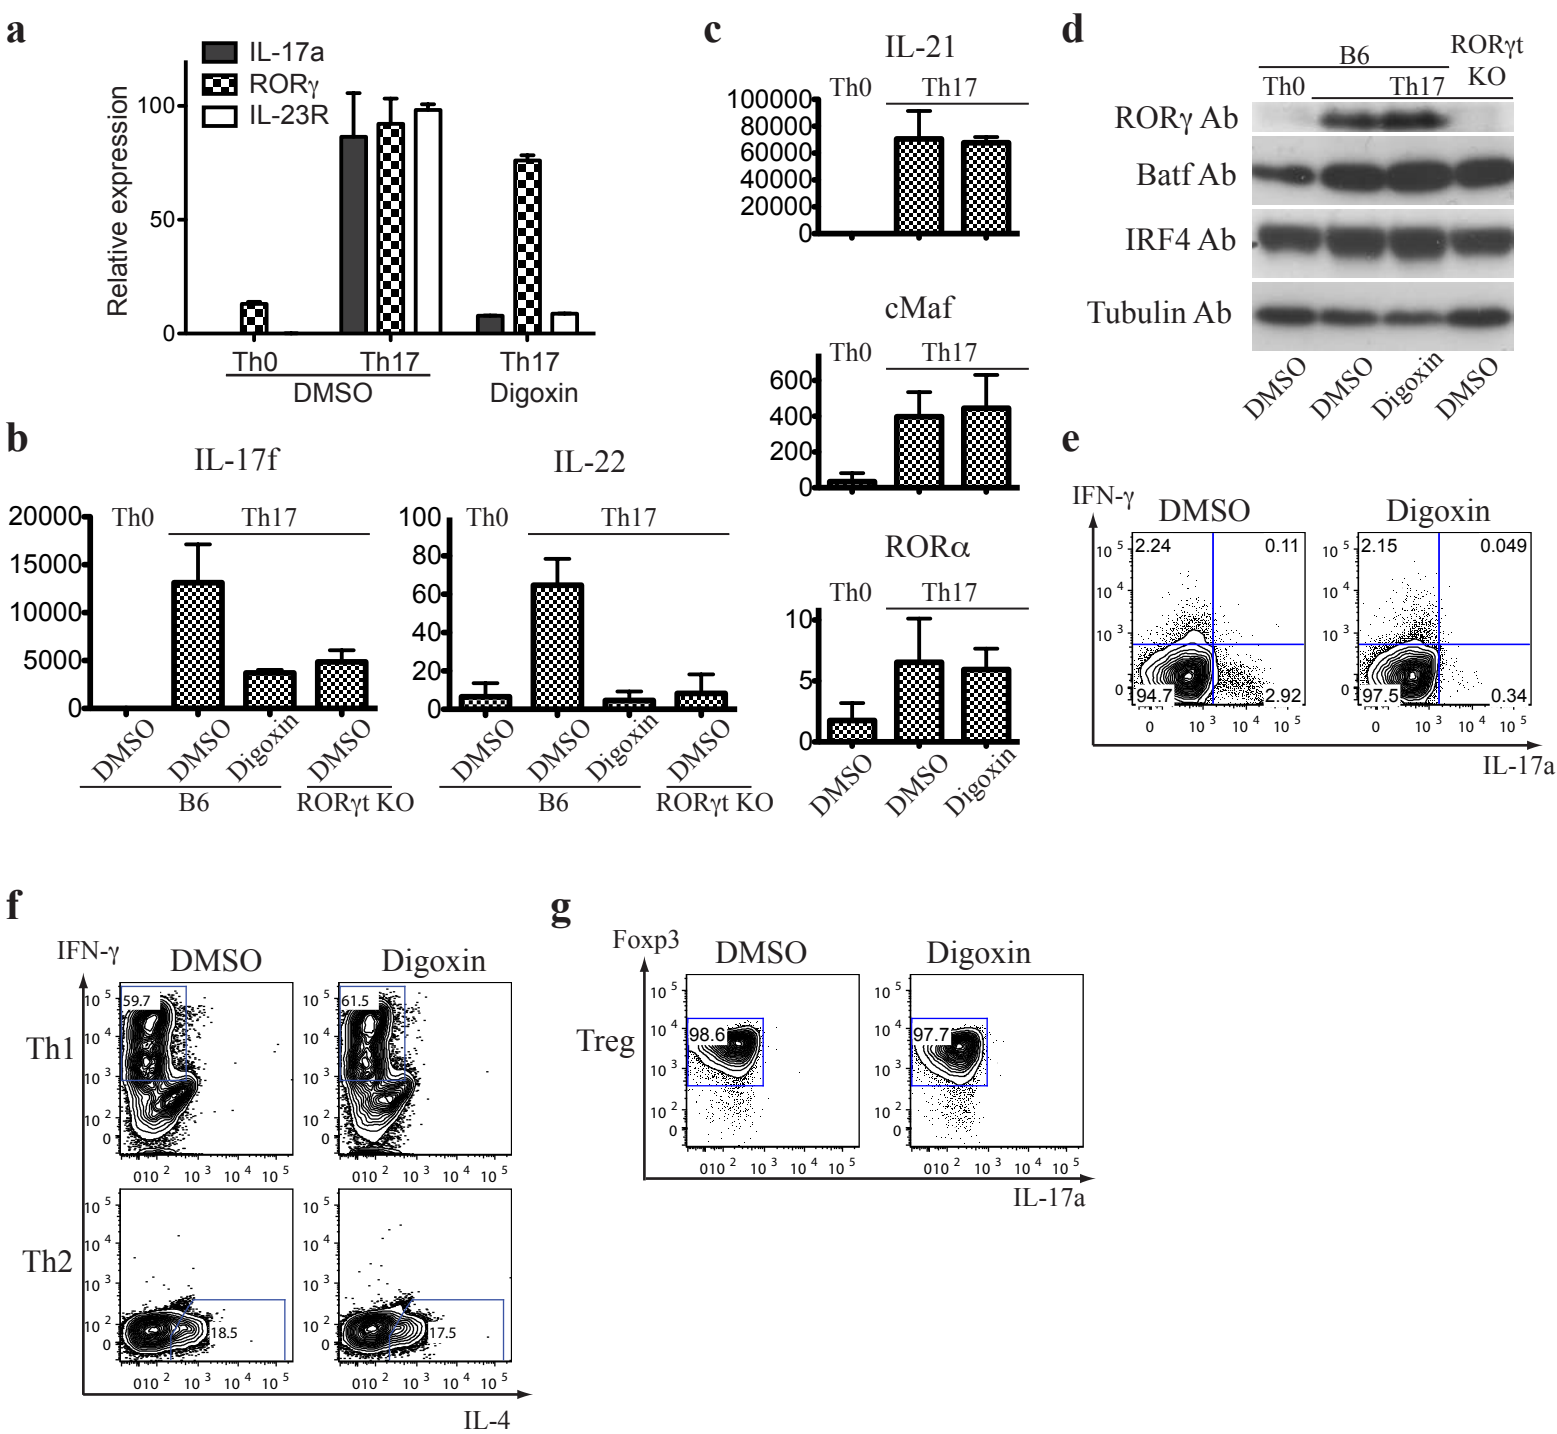

Supplementary figure 4

**a**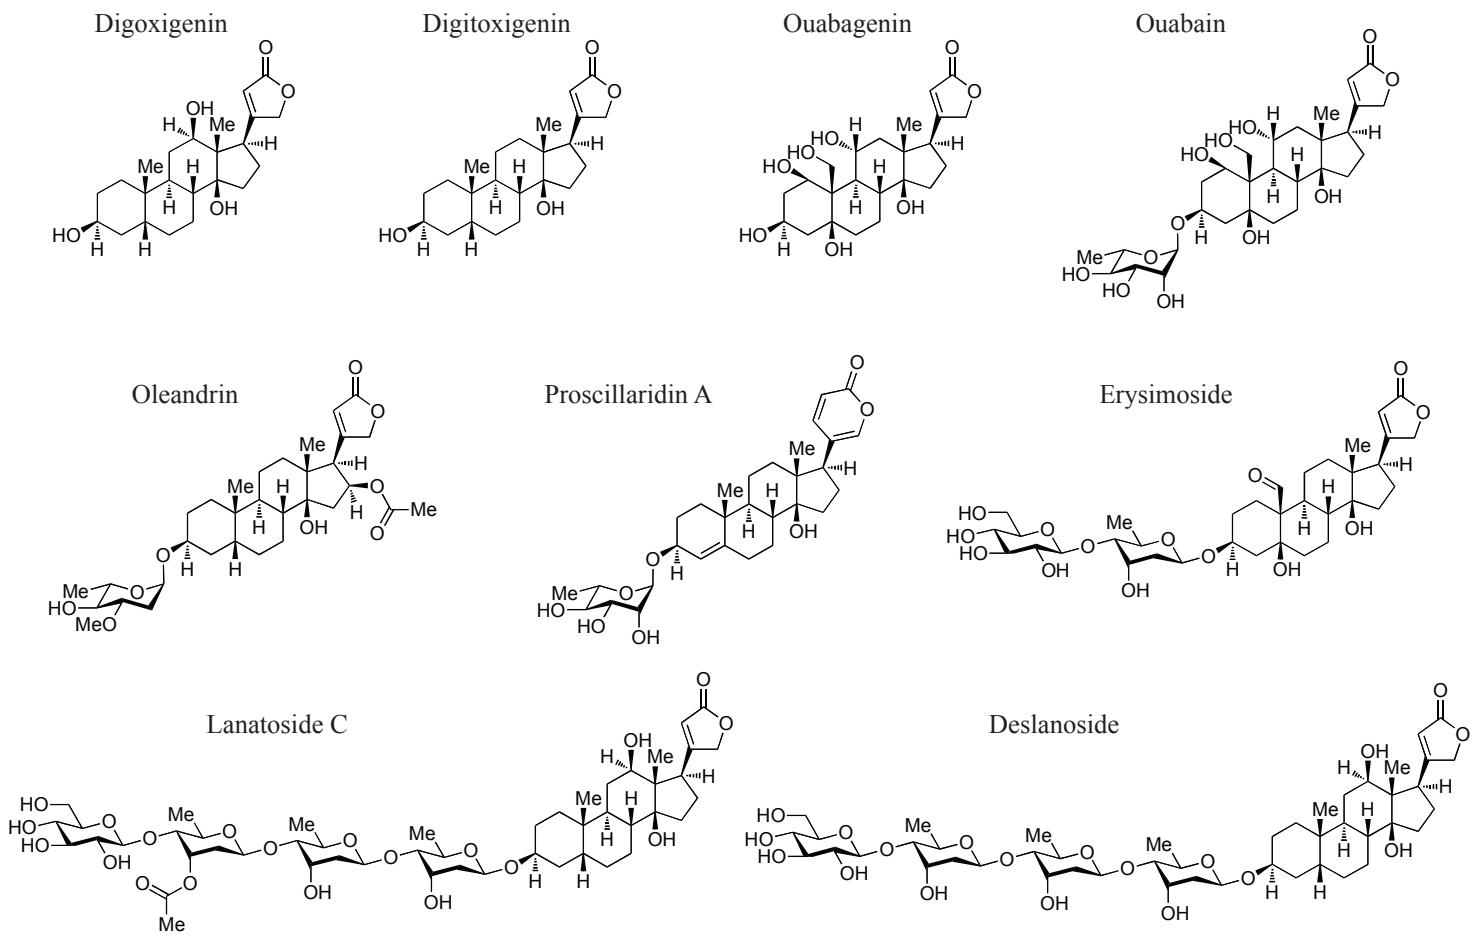**b**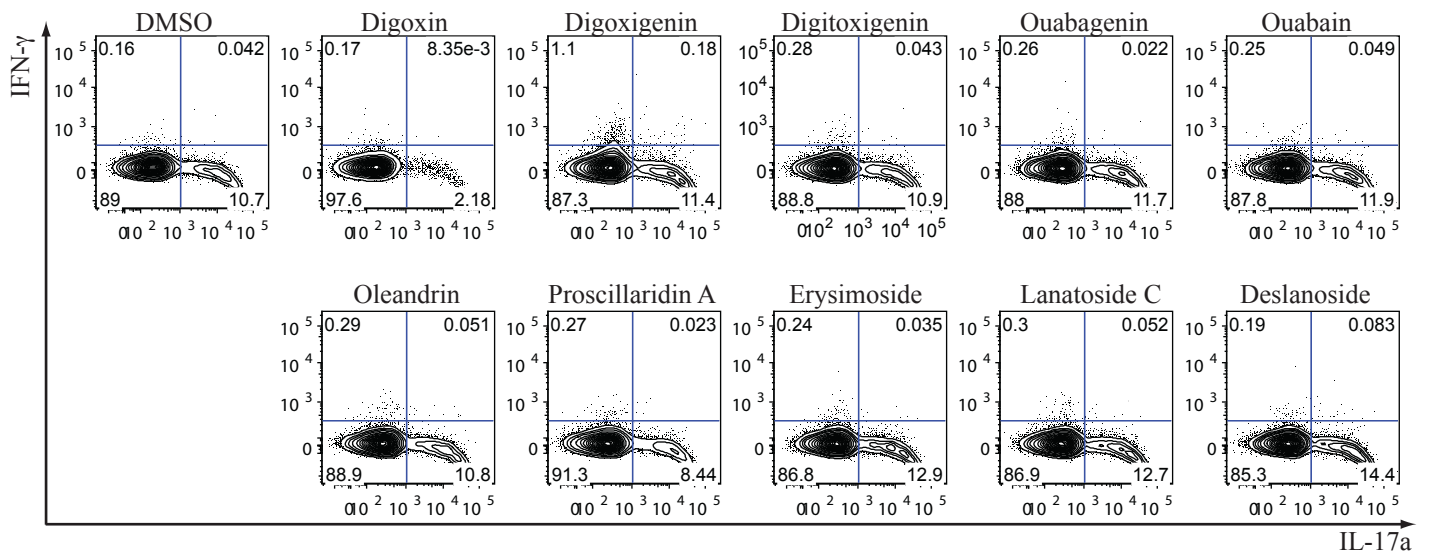

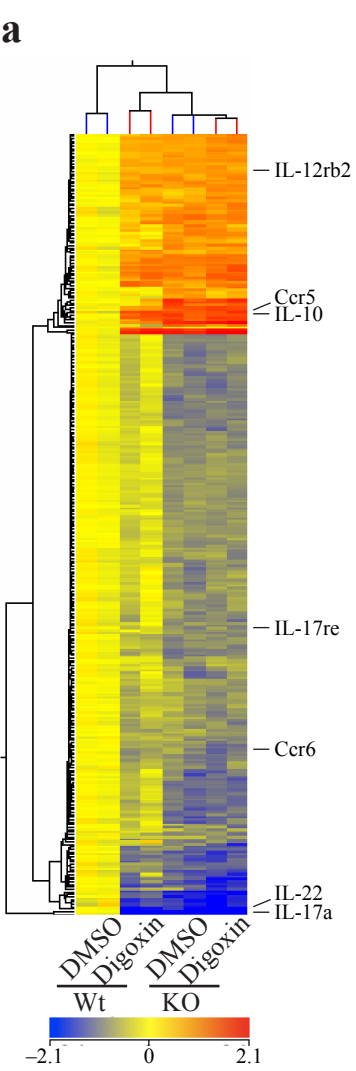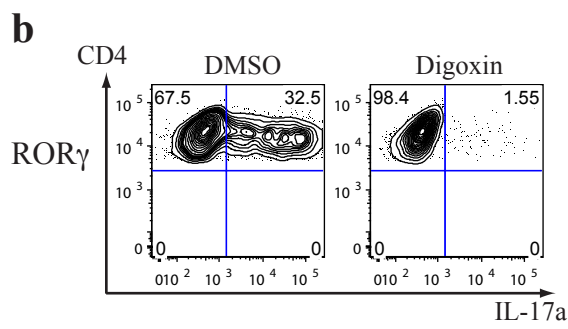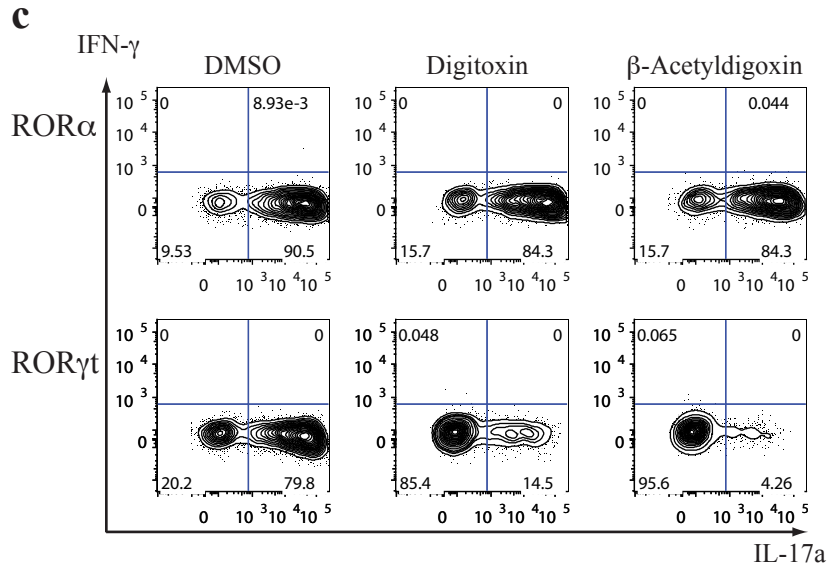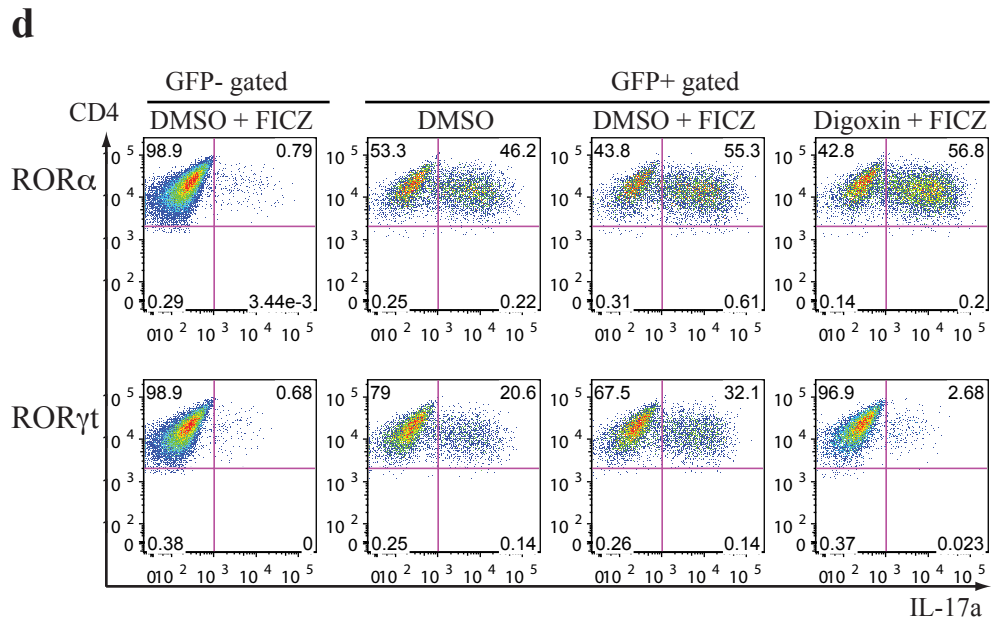

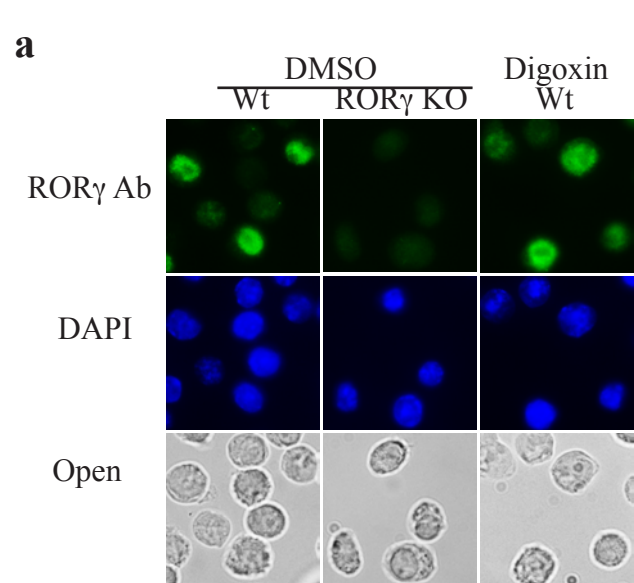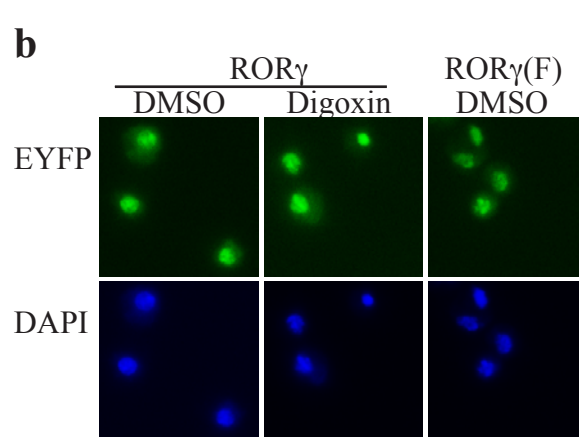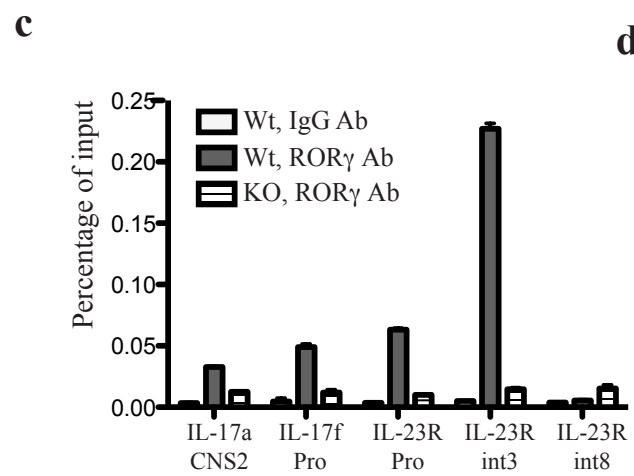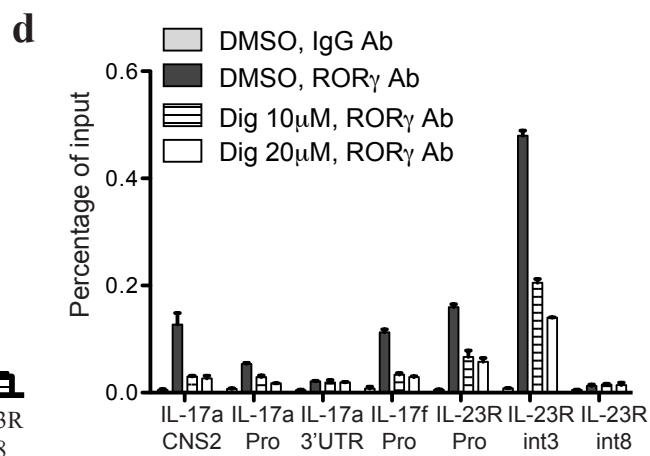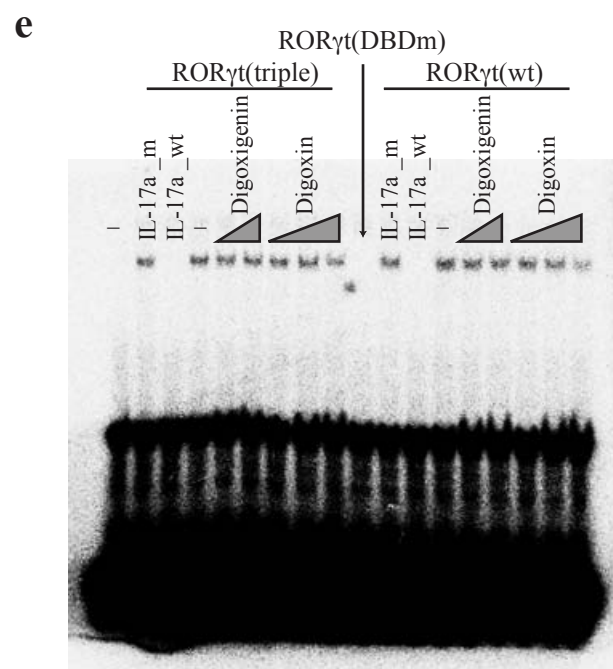

**a**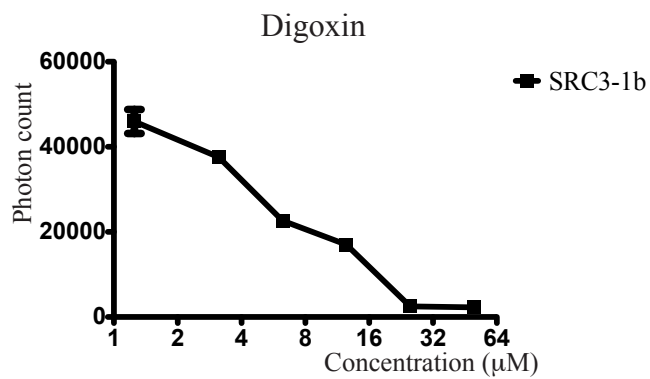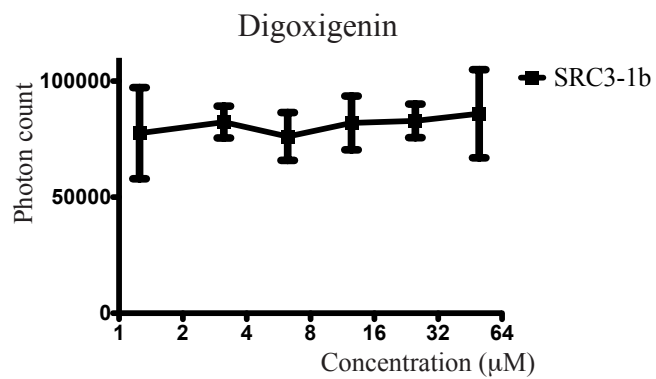**b**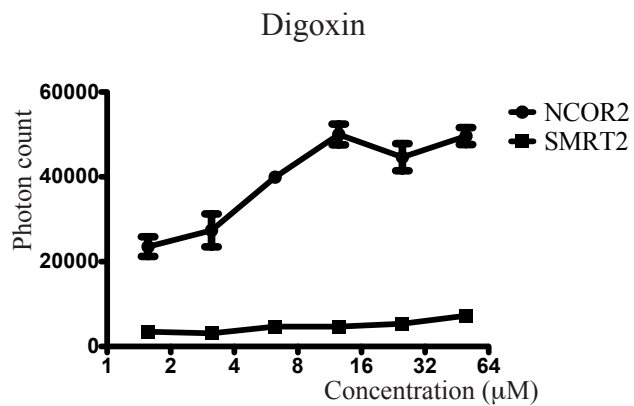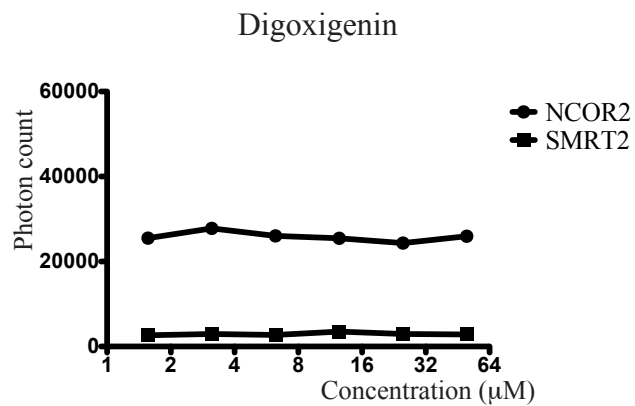



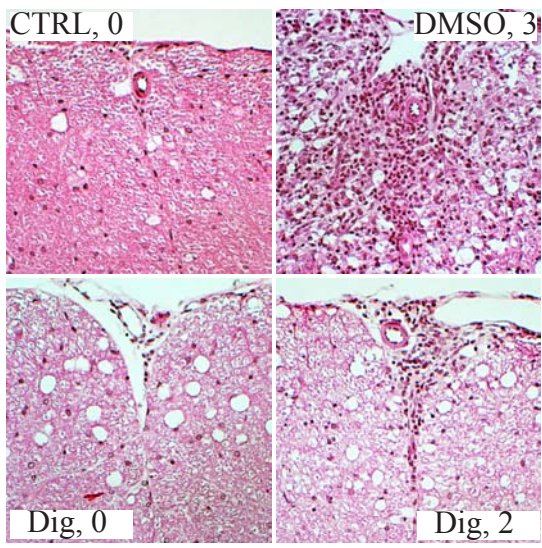

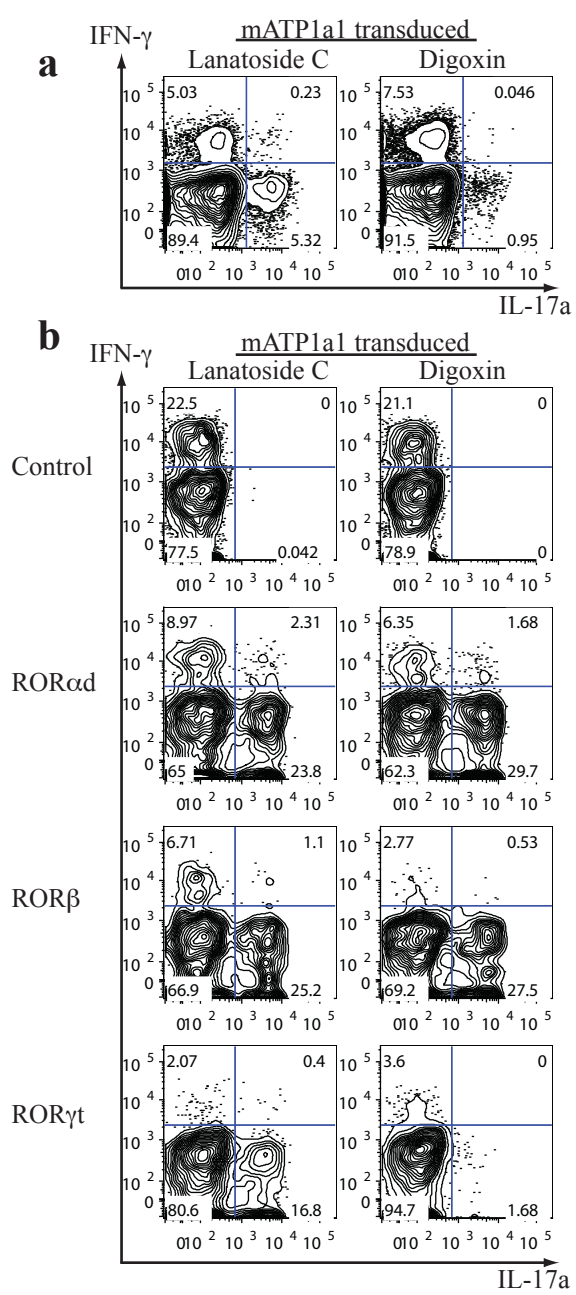

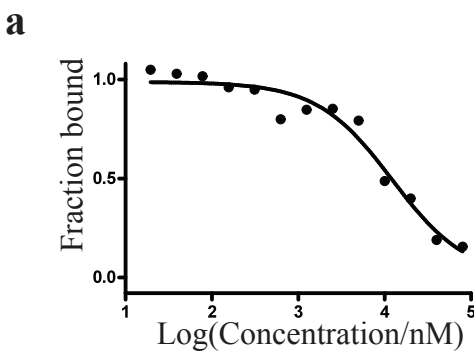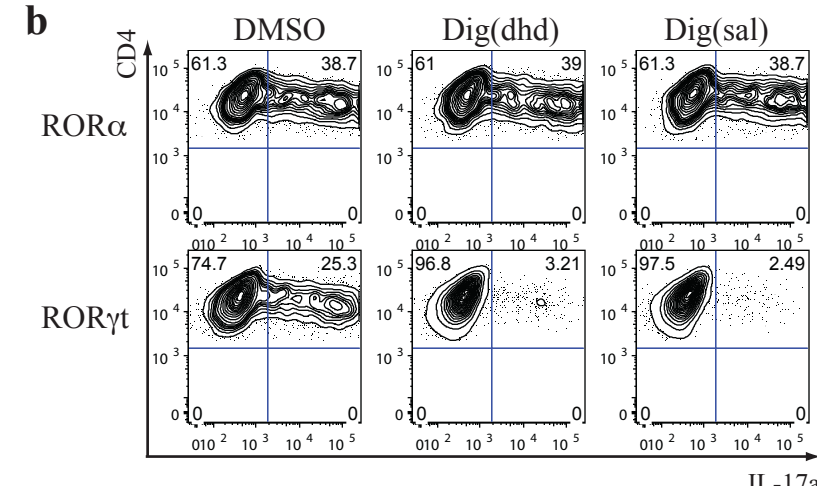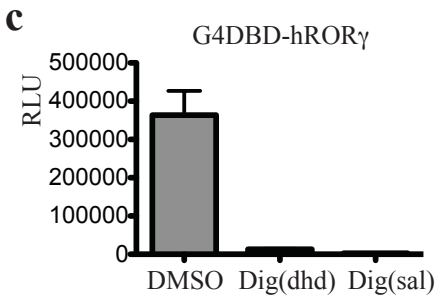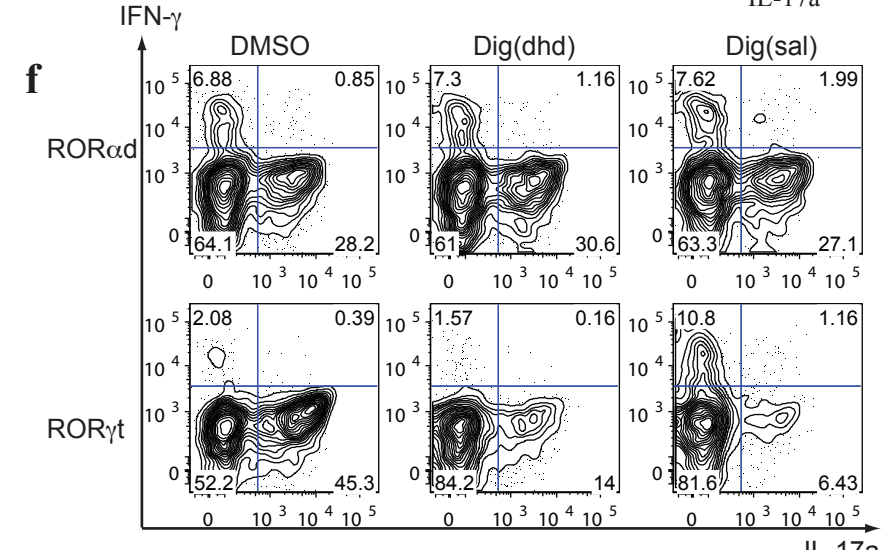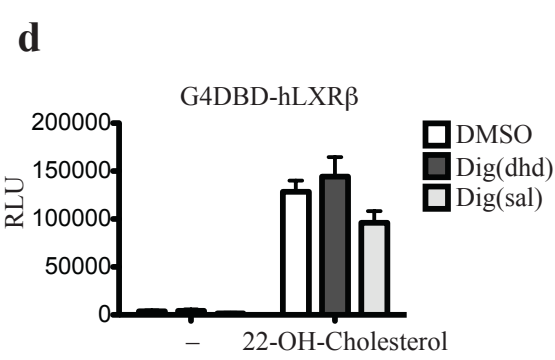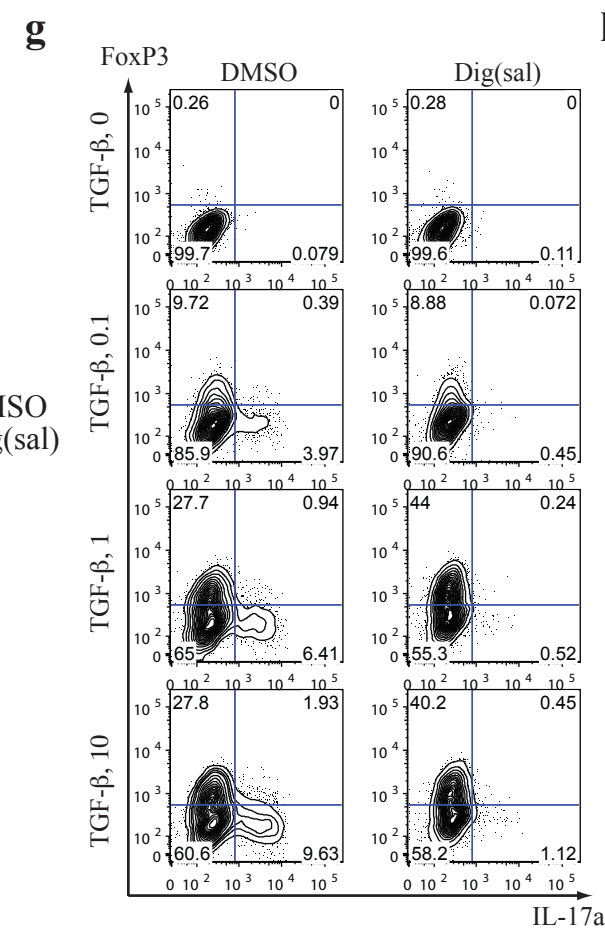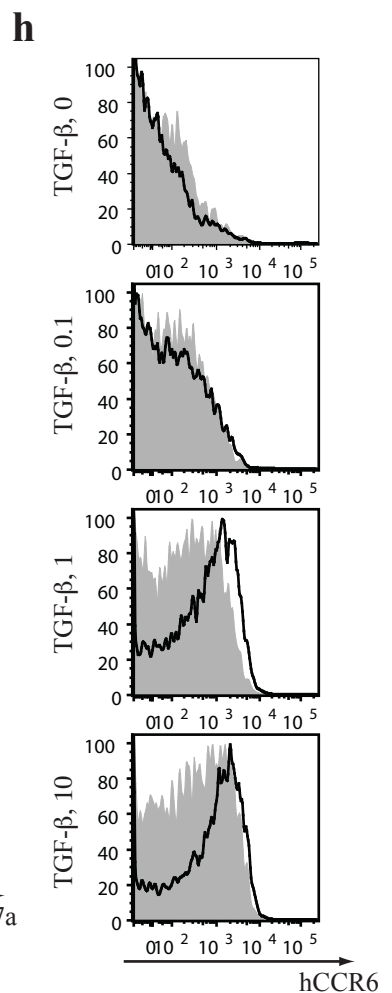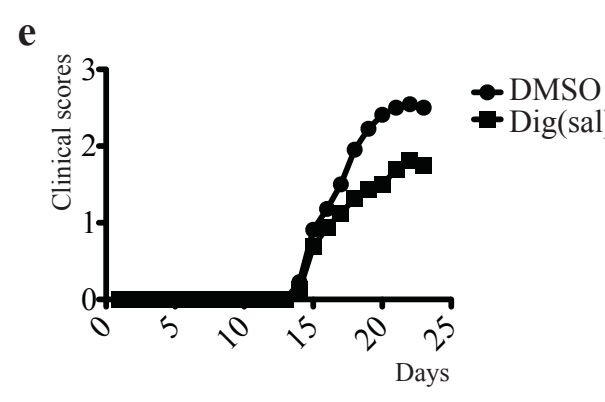

Supplementary figure 11

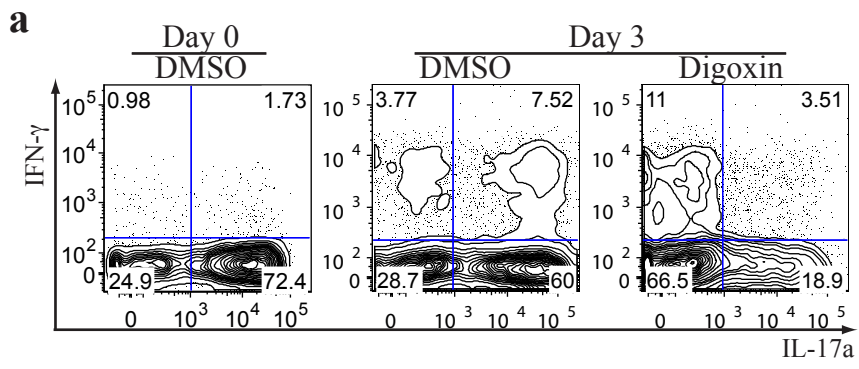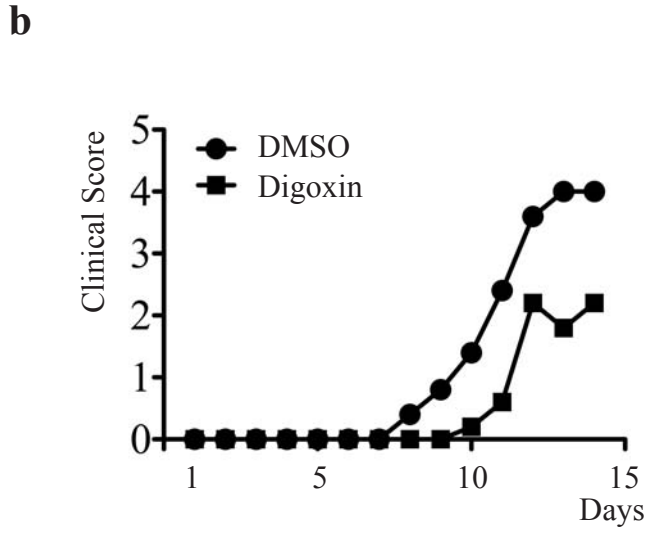

**a**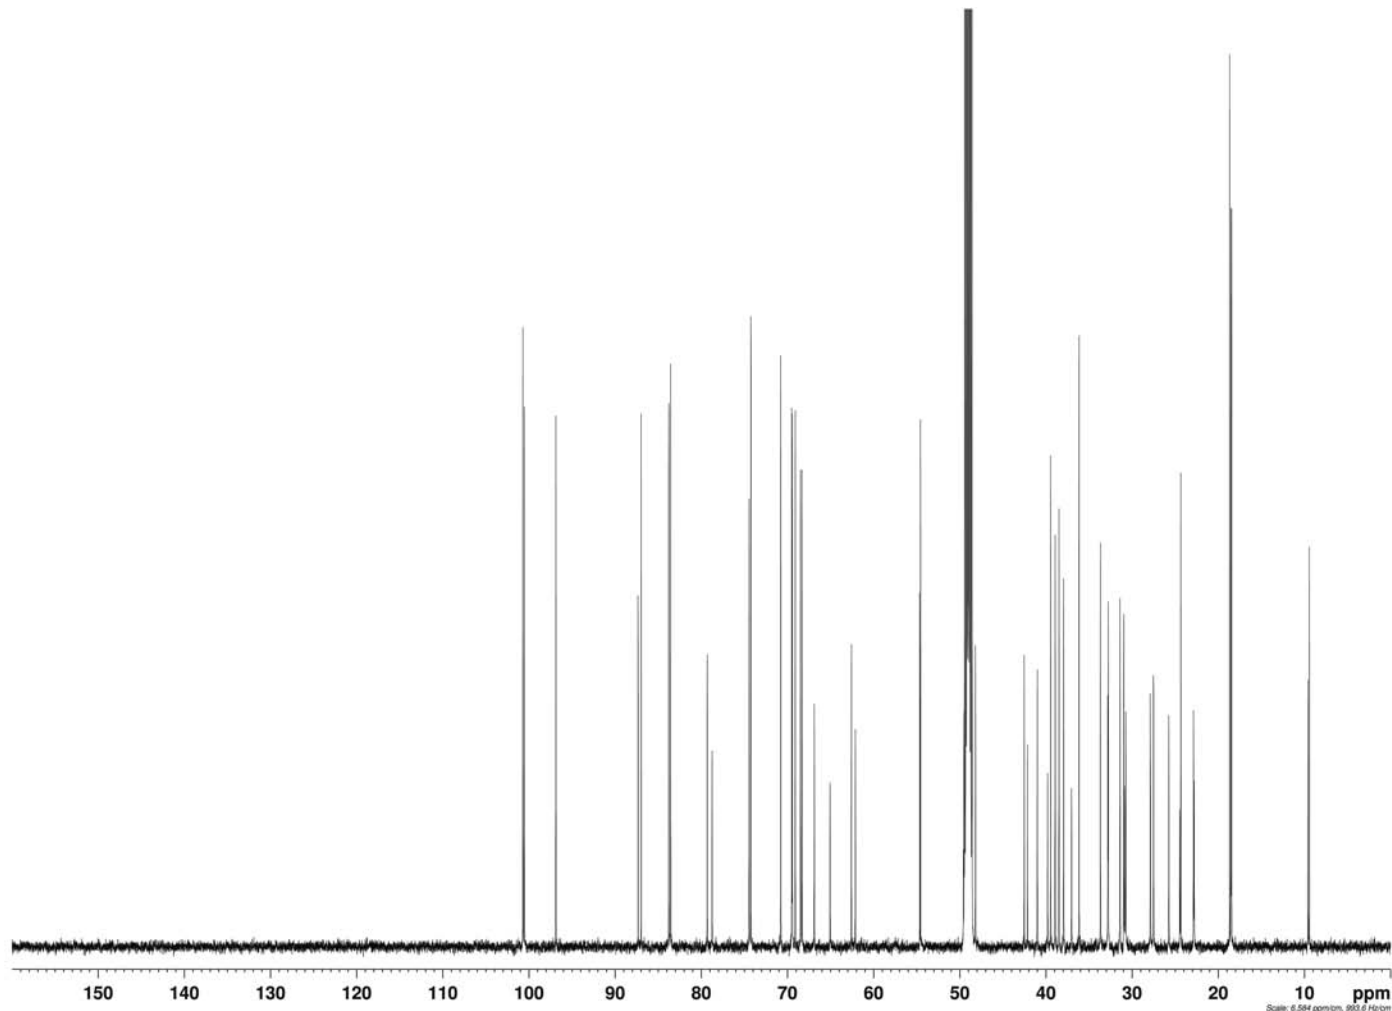**b**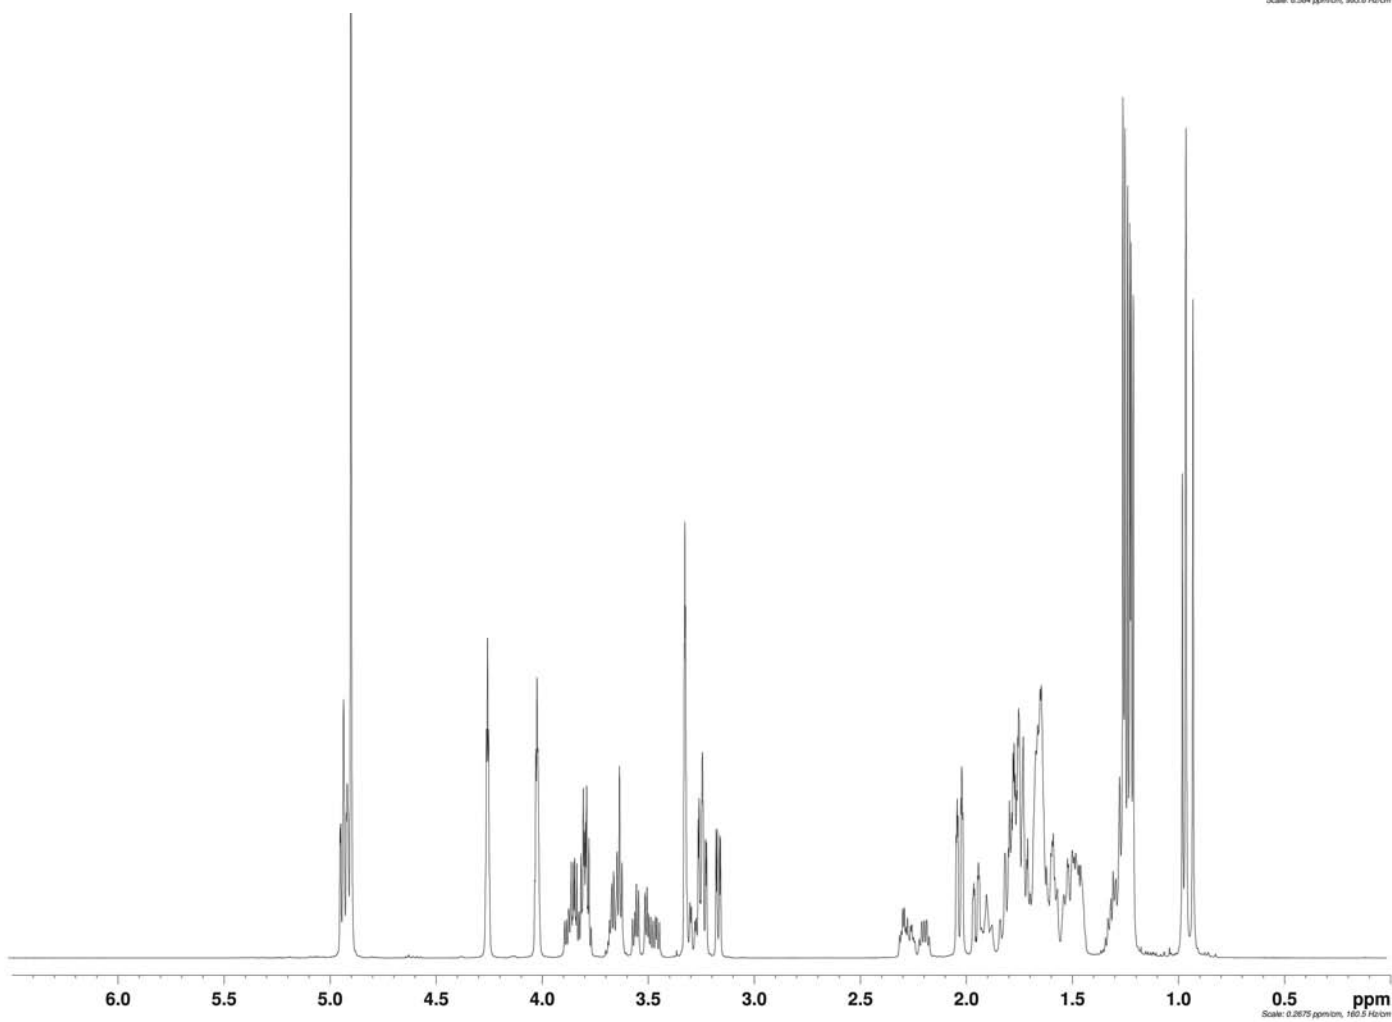

Supplementary figure 13

**a**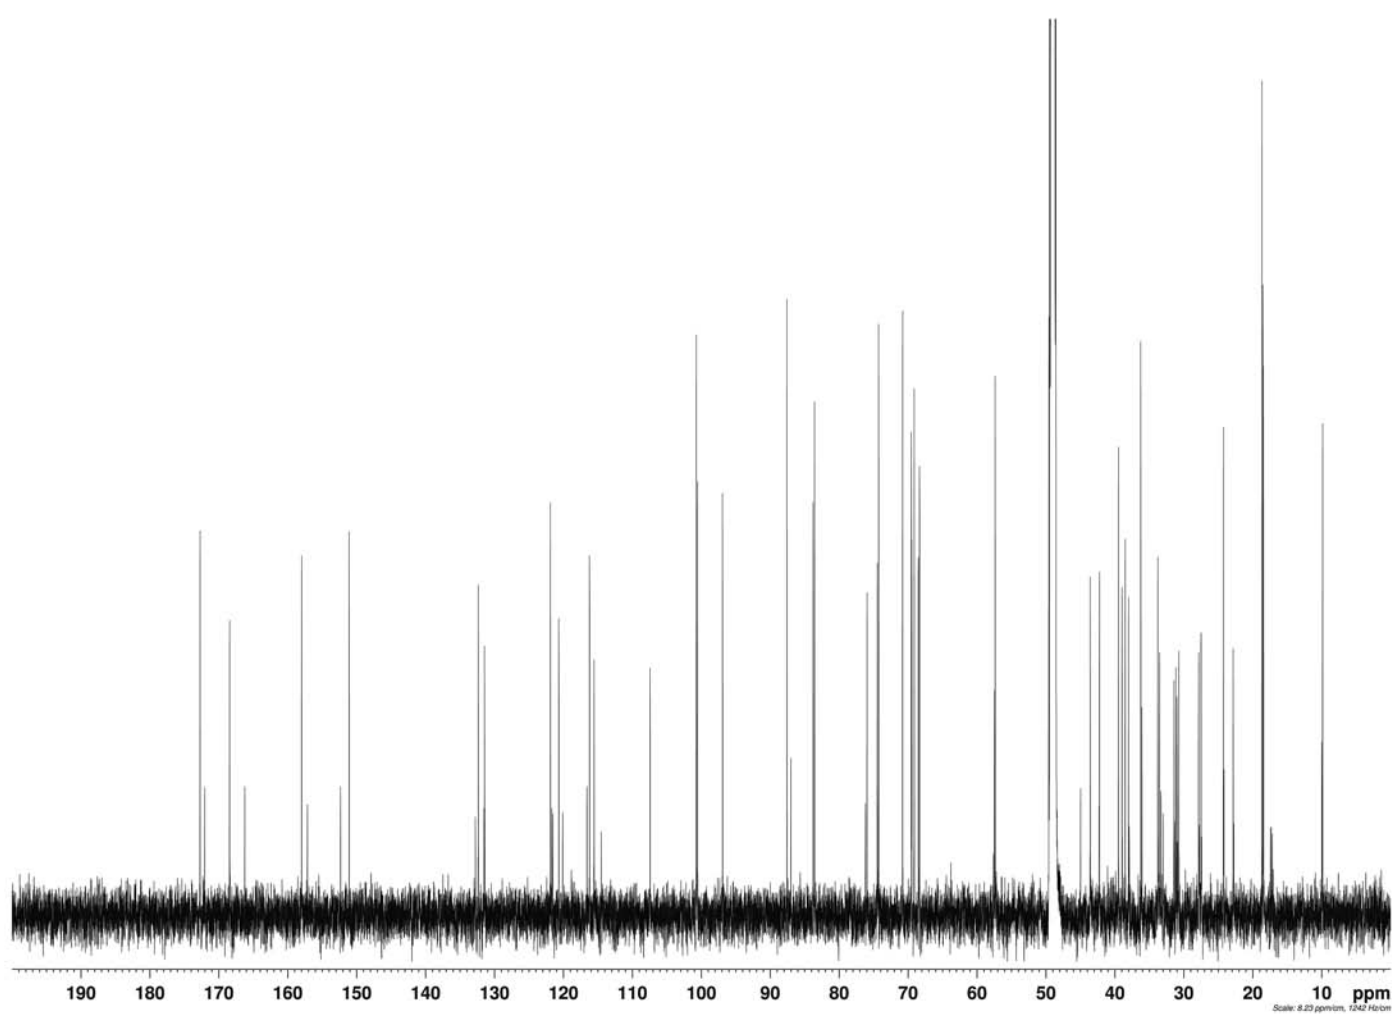**b**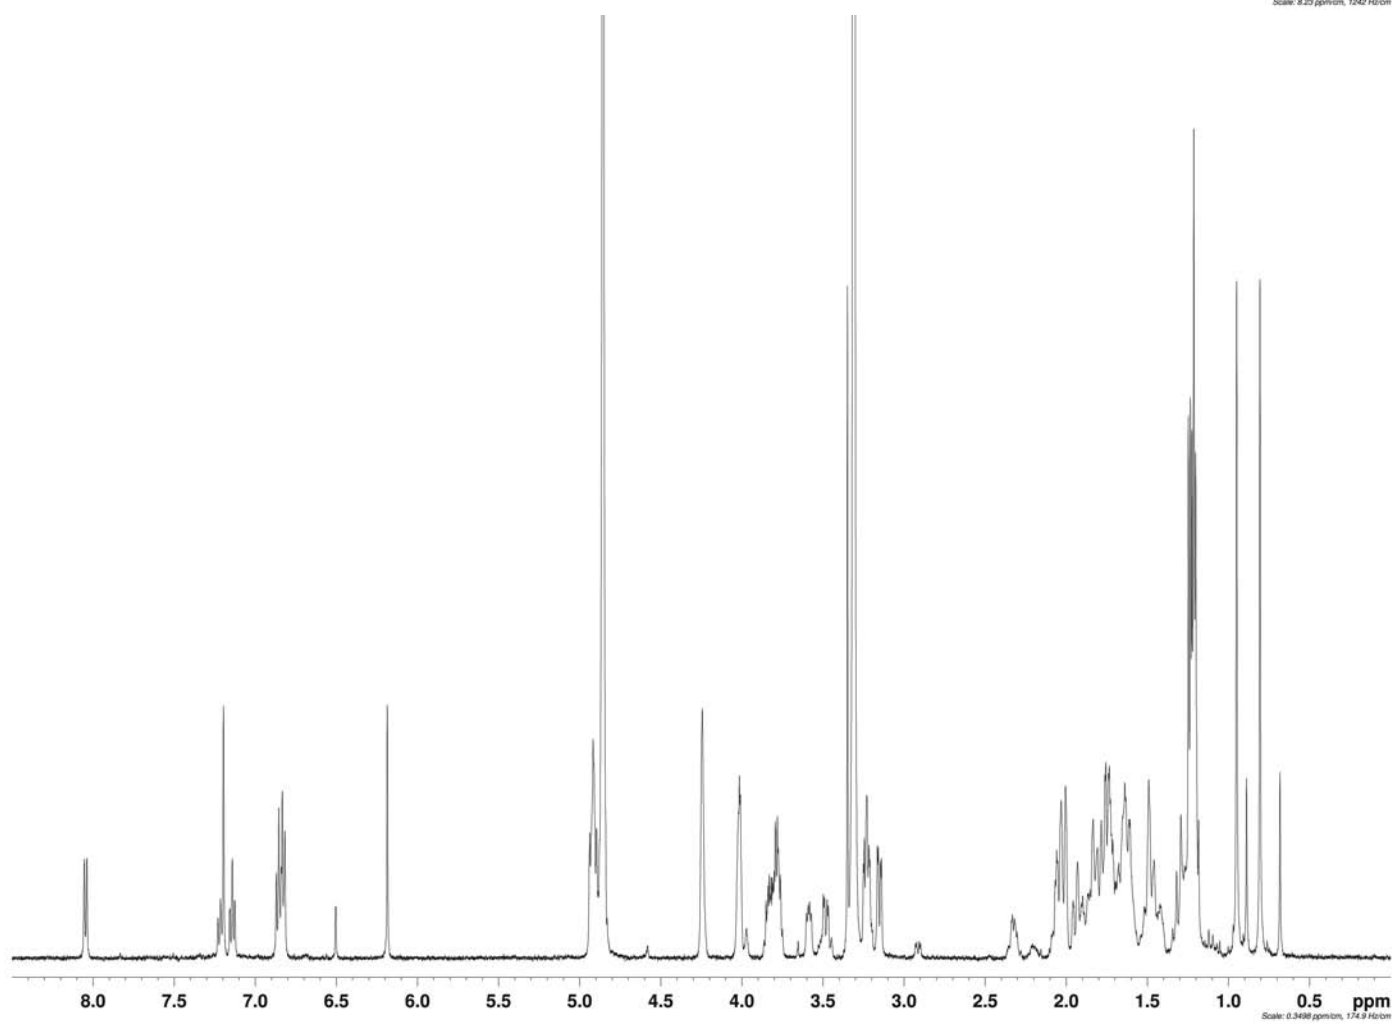

Supplementary figure 14
